# Supplementary material for: Longitudinal change in mitochondrial heteroplasmy exhibits positive selection for deleterious variants
Source: PubMed Central journal article supplement — medRxiv. 2024 Apr 3:2024.03.27.24304930. Preprint. [Version 2] doi: 10.1101/2024.03.27.24304930 (PMC10996716; doi:10.1101/2024.03.27.24304930), 2024-04-03
Supplement: NIHPP2024.03.27.24304930v2-supplement-1.pdf [file NIHPP2024.03.27.24304930v2-supplement-1.pdf]

**Supplementary Table 1. Study population characteristics stratified by number of heteroplasmies.**

|                             | Multi-Ethnic Study of Arteriosclerosis |                         |                         | Rotterdam Study         |                         |                         |
|-----------------------------|----------------------------------------|-------------------------|-------------------------|-------------------------|-------------------------|-------------------------|
|                             | 0<br>(N=643)                           | 1+<br>(N=388)           | Overall<br>(N=1031)     | 0<br>(N=221)            | 1+<br>(N=152)           | Overall<br>(N=373)      |
| <b>Age<br/>(Time 1)</b>     |                                        |                         |                         |                         |                         |                         |
| Mean<br>(SD)                | 58.7<br>(9.0)                          | 60.1<br>(8.8)           | 59.2 (8.9)              | 64.5<br>(5.54)          | 66.7<br>(6.16)          | 65.4<br>(5.89)          |
| Median<br>[Min, Max]        | 58.0<br>[44.0,<br>83.0]                | 59.0<br>[45.0,<br>82.0] | 58.0<br>[44.0,<br>83.0] | 64.3<br>[55.4,<br>79.9] | 65.6<br>[55.4,<br>95.1] | 64.8<br>[55.4,<br>95.1] |
| <b>Sex</b>                  |                                        |                         |                         |                         |                         |                         |
| Women                       | 350<br>(54.4%)                         | 204<br>(52.6%)          | 554<br>(53.7%)          | 123<br>(55.7%)          | 94<br>(61.8%)           | 217<br>(58.2%)          |
| Men                         | 293<br>(45.6%)                         | 184<br>(47.4%)          | 477<br>(46.3%)          | 98<br>(44.3%)           | 58<br>(38.2%)           | 156<br>(41.8%)          |
| <b>Race</b>                 |                                        |                         |                         |                         |                         |                         |
| White /<br>European         | 248<br>(38.6%)                         | 176<br>(45.4%)          | 424<br>(41.1%)          | 217<br>(98.2%)          | 150<br>(98.7%)          | 367<br>(98.4%)          |
| Chinese /<br>Asian          | 19<br>(3.0%)                           | 9 (2.3%)                | 28<br>(2.7%)            | 2 (0.9%)                | 2 (1.3%)                | 4 (1.1%)                |
| Hispanic                    | 229<br>(35.6%)                         | 118<br>(30.4%)          | 347<br>(33.7%)          |                         |                         |                         |
| Black /<br>African          | 147<br>(22.9%)                         | 85<br>(21.9%)           | 232<br>(22.5%)          | 2 (0.9%)                | 0 (0%)                  | 2 (0.5%)                |
| <b>Smoking<br/>(Time 1)</b> |                                        |                         |                         |                         |                         |                         |
| Current                     | 79<br>(12.3%)                          | 62<br>(16.0%)           | 141<br>(13.7%)          | 47<br>(21.3%)           | 33<br>(21.7%)           | 80<br>(21.4%)           |

|                                              |                       |                       |                       |                      |                      |                      |
|----------------------------------------------|-----------------------|-----------------------|-----------------------|----------------------|----------------------|----------------------|
| Never                                        | 313<br>(48.7%)        | 175<br>(45.1%)        | 488<br>(47.3%)        | 63<br>(28.5%)        | 47<br>(30.9%)        | 110<br>(29.5%)       |
| Previous                                     | 250<br>(38.9%)        | 151<br>(38.9%)        | 401<br>(38.9%)        | 107<br>(48.4%)       | 71<br>(46.7%)        | 178<br>(47.7%)       |
| Missing                                      | 1 (0.2%)              |                       | 1 (0.1%)              | 4 (1.8%)             | 1 (0.7%)             | 5 (1.3%)             |
| <b>Smoking<br/>(Time 2)</b>                  |                       |                       |                       |                      |                      |                      |
| Current                                      | 53<br>(8.2%)          | 39<br>(10.1%)         | 92<br>(8.9%)          | 48<br>(21.7%)        | 28<br>(18.4%)        | 76<br>(20.4%)        |
| Never                                        | 268<br>(41.7%)        | 152<br>(39.2%)        | 420<br>(40.7%)        | 64<br>(29.0%)        | 48<br>(31.6%)        | 112<br>(30.0%)       |
| Previous                                     | 316<br>(49.1%)        | 196<br>(50.5%)        | 512<br>(49.7%)        | 109<br>(49.3%)       | 76<br>(50.0%)        | 185<br>(49.6%)       |
| Missing                                      | 6 (0.9%)              | 1 (0.3%)              | 7 (0.7%)              |                      |                      |                      |
| <b>Time<br/>Between<br/>Visits<br/>(yrs)</b> |                       |                       |                       |                      |                      |                      |
| Mean<br>(SD)                                 | 9.39<br>(0.40)        | 9.39<br>(0.37)        | 9.39<br>(0.39)        | 6.45<br>(0.327)      | 6.43<br>(0.324)      | 6.44<br>(0.325)      |
| Median<br>[Min, Max]                         | 9.42<br>[8.10, 10.60] | 9.41<br>[7.96, 10.50] | 9.42<br>[7.96, 10.60] | 6.42<br>[5.29, 8.32] | 6.40<br>[5.17, 7.80] | 6.41<br>[5.17, 8.32] |
| <b>Status</b>                                |                       |                       |                       |                      |                      |                      |
| Alive                                        | 579<br>(90.0%)        | 335<br>(86.3%)        | 914<br>(88.7%)        | 146<br>(66.1%)       | 101<br>(66.4%)       | 247<br>(66.2%)       |
| Dead                                         | 63<br>(9.8%)          | 53<br>(13.7%)         | 116<br>(11.3%)        | 75<br>(33.9%)        | 51<br>(33.6%)        | 126<br>(33.8%)       |
| Missing                                      | 1 (0.2%)              |                       | 1 (0.1%)              |                      |                      |                      |

| Time to Event (yrs) |                    |                   |                    |                    |                    |                    |
|---------------------|--------------------|-------------------|--------------------|--------------------|--------------------|--------------------|
| Mean (SD)           | 7.75 (1.30)        | 7.65 (1.45)       | 7.71 (1.36)        | 8.57 (2.55)        | 8.58 (2.60)        | 8.57 (2.57)        |
| Median [Min, Max]   | 8.07 [0.972, 8.68] | 8.07 [1.08, 8.68] | 8.07 [0.972, 8.68] | 10.0 [0.110, 10.0] | 10.0 [0.244, 10.0] | 10.0 [0.110, 10.0] |
| Missing             | 1 (0.2%)           | 2 (0.5%)          | 3 (0.3%)           |                    |                    |                    |

**Supplementary Table 2. deltaVAF stratified by extant vs. de novo**

|                 | <b>Multi-Ethnic Study of Atherosclerosis</b> |                      | <b>Rotterdam Study</b> |                     |
|-----------------|----------------------------------------------|----------------------|------------------------|---------------------|
| <b>deltaVAF</b> | <b>Extant (385)</b>                          | <b>De novo (126)</b> | <b>Extant (172)</b>    | <b>De novo (39)</b> |
| -0.10           | 22                                           | 0                    | 5                      | 0                   |
| -0.05           | 38                                           | 0                    | 14                     | 0                   |
| Neutral         | 305                                          | 20                   | 126                    | 7                   |
| +0.05           | 17                                           | 27                   | 12                     | 7                   |
| +0.10           | 12                                           | 48                   | 13                     | 19                  |
| +0.20           | 0                                            | 15                   | 2                      | 6                   |

*Note:* Negative values are less or equal positive values are greater or equal

**Supplementary Table 3. Associations between rank-transformed deltaVAF and all-cause mortality**

|         | n/N    | MESA<br>HR (95% CI) | n/N    | RS<br>HR (95% CI) |
|---------|--------|---------------------|--------|-------------------|
| Model 1 | 53/385 | 1.46 (1.06, 1.99)   | 51/152 | 1.38 (1.04, 1.82) |

*Note:* Model 1 was adjusted for age using a natural spline with 4 degrees of freedom, sex, race, and smoking status (current, previous, never). Analyses for MESA also included DNA collection center and sequencing batch.

# Supplementary Fig 1. Meta-analyses of association between functional categories and functional consequence and deltaVAF.

**A**

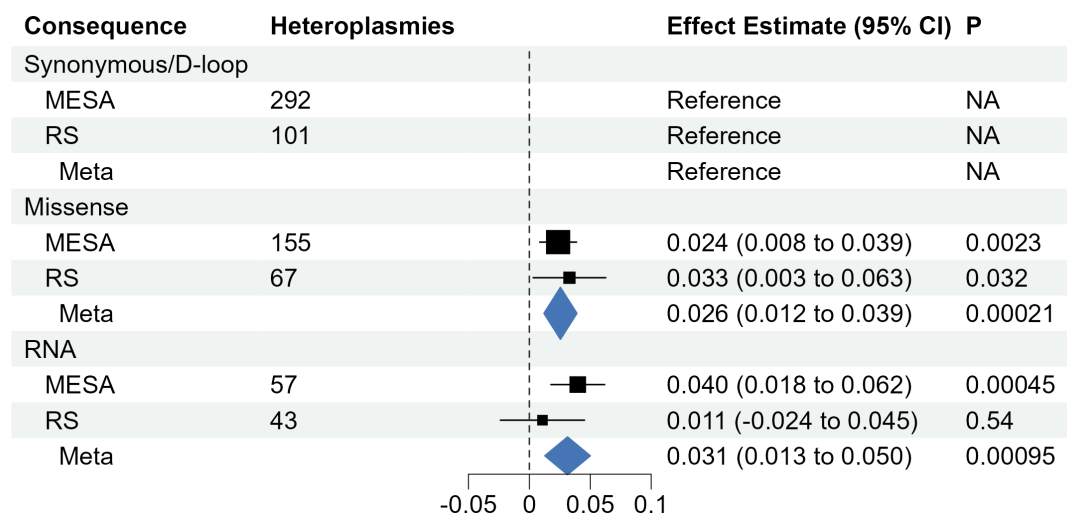

**B**

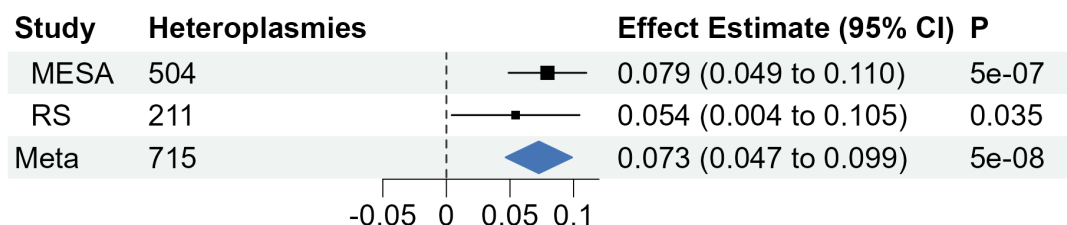

**a**, Meta-analyses of the associations of functional categories on deltaVAF. **b**, Meta-analysis of mMLC on deltaVAF

**Supplementary Fig 2. Association between functional categories and functional consequence and deltaVAF in sub-sampled cohorts.**

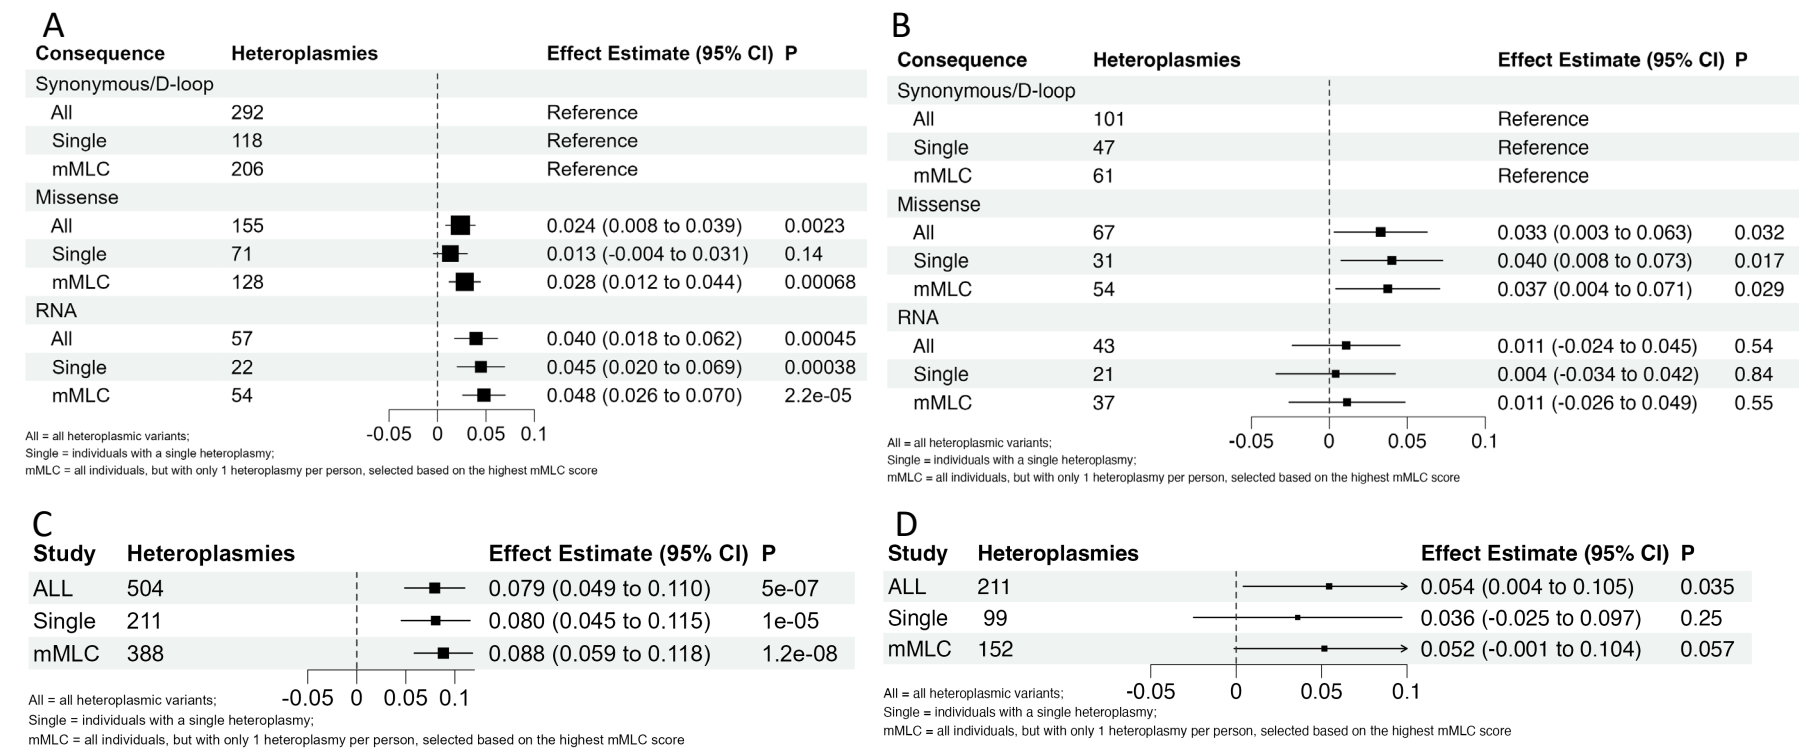

**a,b**, Associations of functional categories with deltaVAF in **(a)** MESA and **(b)** RS. **c,d**, Association of mMLC and deltaVAF in **(c)** MESA and **(d)** RS. ALL indicates the full cohort, Single indicates individuals with only a single heteroplasmy, and mMLC indicates all individuals, but with only 1 heteroplasmy chosen per person, selected based on the highest mMLC score.

**Supplementary Fig 3. deltaVAF distribution stratified by de novo status.**

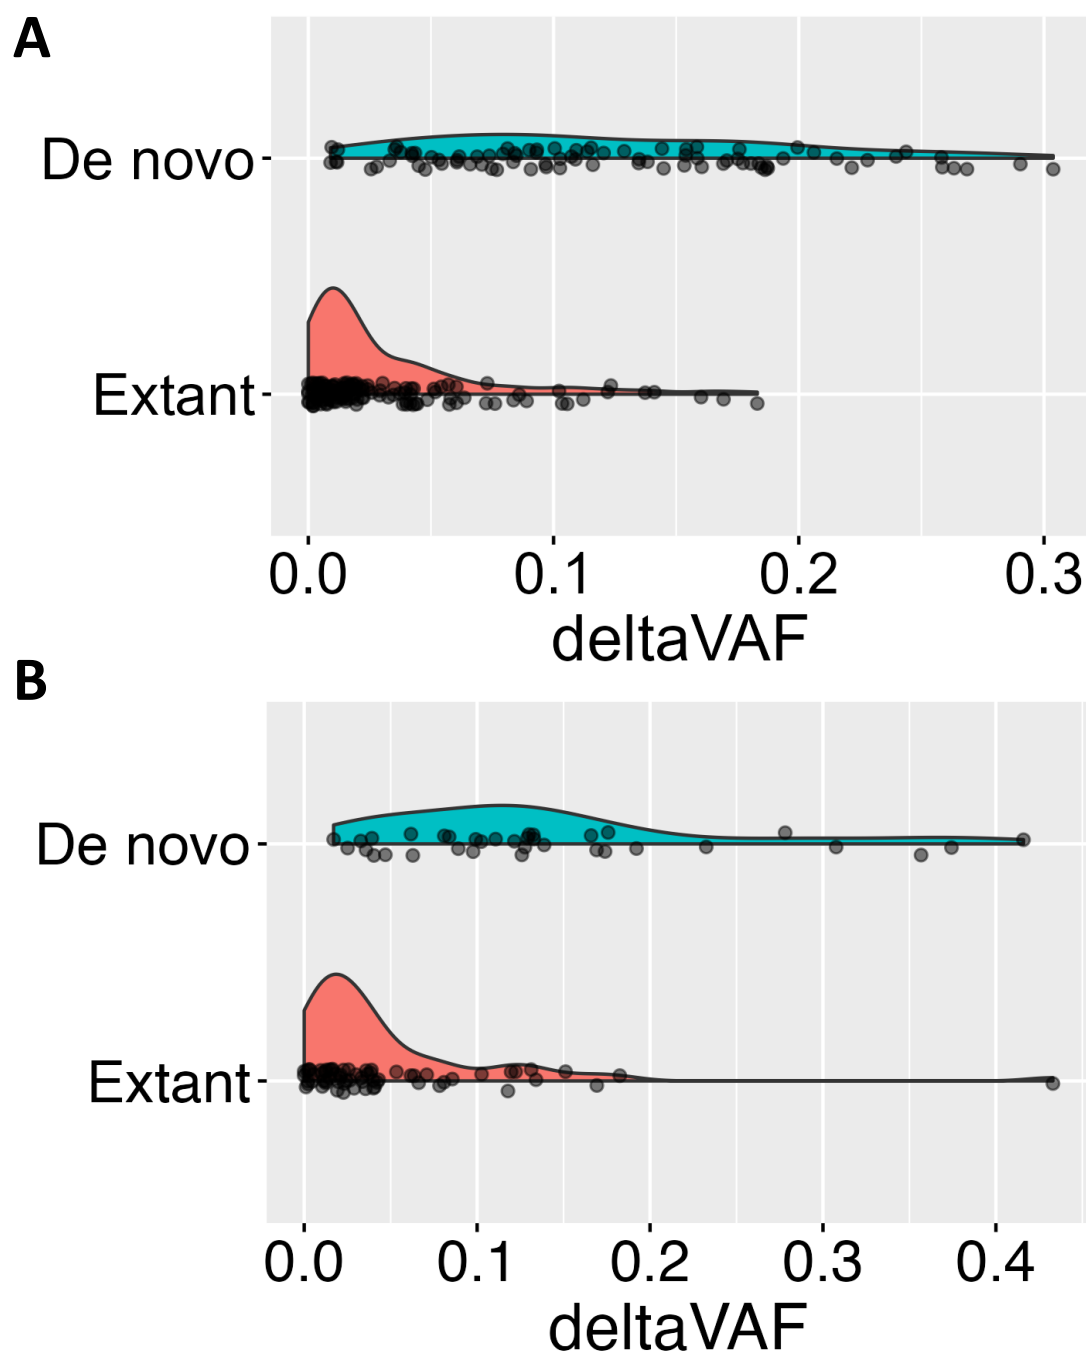

**a,b**, Density plots of deltaVAF stratified by de novo status in in (a) MESA and (b) RS. De novo is defined as being VAF<0.05 at baseline, and greater than 0.05 in the second visit.

**Supplementary Fig 4. Comparison of VAF between WGS and Twist sequencing.**

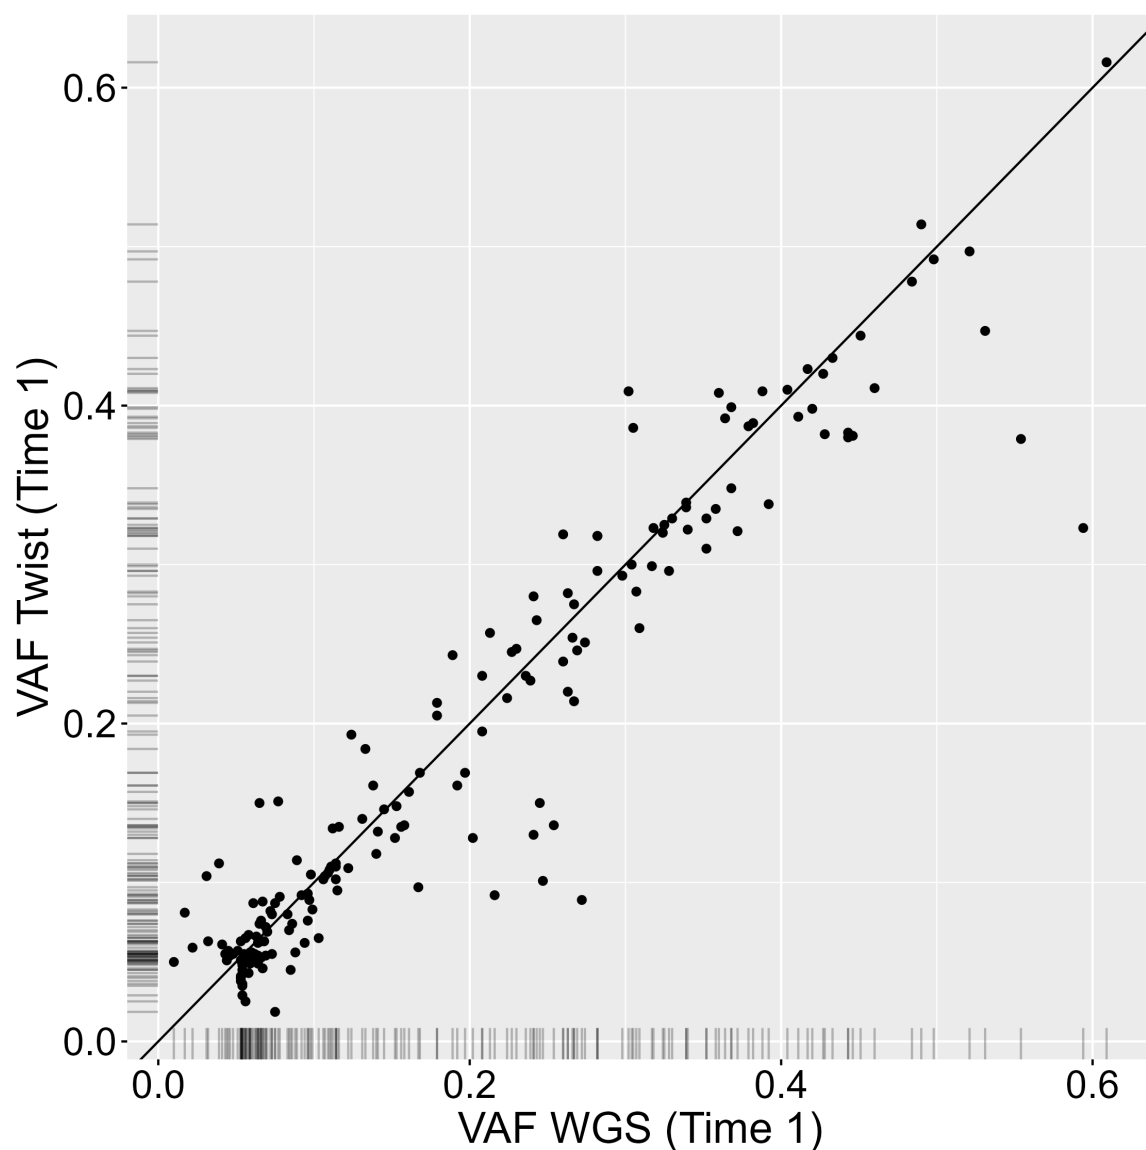

Correlation between VAF at the first measurement (x-axis) and the second measurement (y-axis), with the black line indicating perfect correlation. Data is generated from 406 MESA samples sequenced by both technologies at the baseline visit.
